# Supplementary material
Source: MDPI journal article supplement (https://www.mdpi.com/1999-4907/9/8/443)

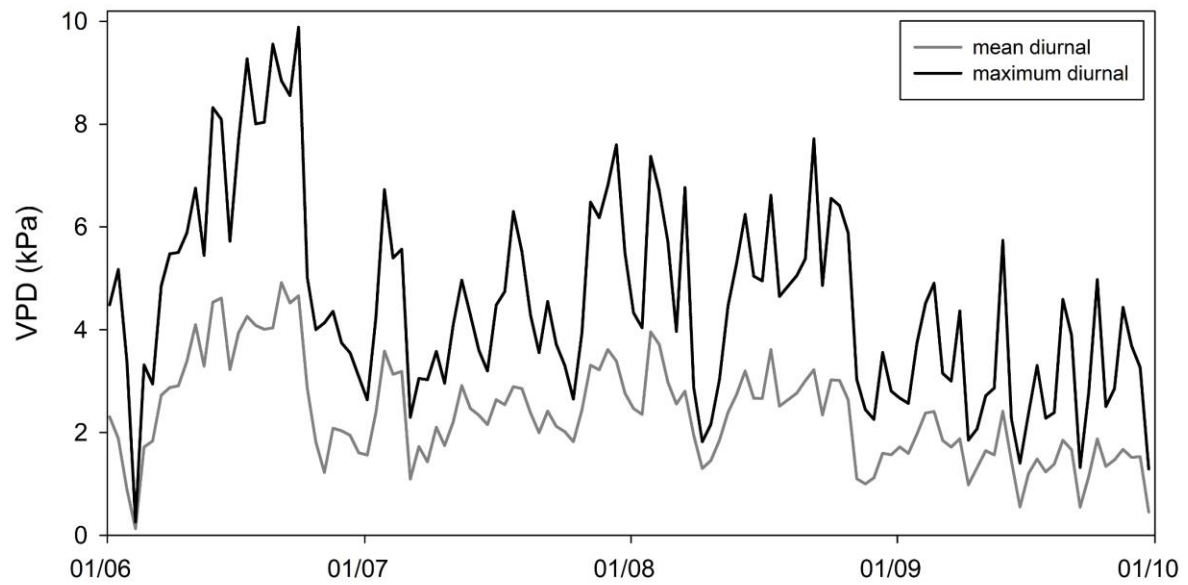

**Figure S1:** Mean and maximum diurnal VPD at the experimental site from June to September of 2017.

Supplement: s1 [file s1]
